# Supplementary material
Source: Springer Nature journal article supplement (https://www.springermedizin.de/resource/supplementary/12963_2012_210_MOESM1_ESM.pdf/9572408)

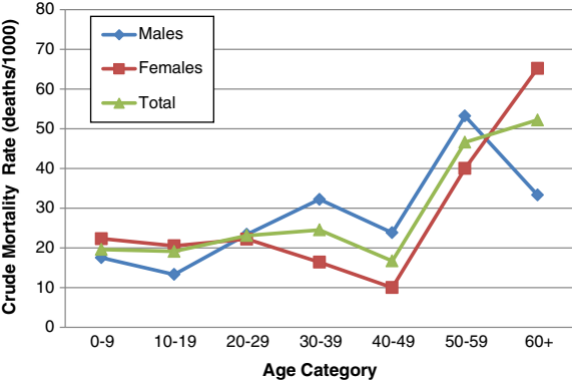

Supplement: MOESM1 [file 9572408]
